# Supplementary material for: Health Hazard Evaluations of occupational cancer cluster concerns: the USA, January 2001–December 2020
Source: HighWire-hosted journal article supplement (doi:10.1136/oemed-2023-108988), 2023-11-06
Supplement: oemed-2023-108988supp001_data_supplement.pdf [file oemed-2023-108988supp001_data_supplement.pdf]

Supplemental Table: Characteristics and findings of seven completed NIOSH Health Hazard Evaluations (HHEs) determined to be cancer clusters — United States, 2001–2020.

| Year | Industry Sector                  | Exposure of concern                               | Cancer sites (number of cases)                                      | Investigative procedures         | Individual cluster determinations made by investigators                          | Conclusion and recommendations from the final documentation*                                                                                                                                                                                                                                                                                                                                                                                                                                              |
|------|----------------------------------|---------------------------------------------------|---------------------------------------------------------------------|----------------------------------|----------------------------------------------------------------------------------|-----------------------------------------------------------------------------------------------------------------------------------------------------------------------------------------------------------------------------------------------------------------------------------------------------------------------------------------------------------------------------------------------------------------------------------------------------------------------------------------------------------|
| 2002 | Public Administration            | Unknown                                           | Brain (unknown)                                                     | Unknown                          | Unknown                                                                          | Preliminary investigation suggested that brain cancers might be in excess, but the data were insufficient to draw a firm conclusion. Investigators recommended that the company hire a consultant to conduct a cohort mortality study given the large scope of concern.                                                                                                                                                                                                                                   |
| 2003 | Educational Services             | Radon (from past industrial or mining operations) | Lung, Melanoma, Kidney, Blood, Breast, Uterine, Pancreas (12 total) | Record review                    | Unusual distribution of cancer                                                   | Multiple types of cancers and the lack of a unifying occupational exposure in the workplace led investigators to conclude the cancers were not likely related to an occupational exposure. No recommendations were made.                                                                                                                                                                                                                                                                                  |
| 2008 | Healthcare and Social Assistance | Ionizing radiation                                | Thyroid (5)                                                         | Rate calculations, record review | Excess cancer cases, unusual distribution of cancer, and presence of an exposure | Cases of papillary thyroid cancer could not be definitively linked to the suspected exposure (ionizing radiation). Investigators determined the risk of developing thyroid cancer among employees exposed to ionizing radiation appeared to be minimal. The cases of thyroid cancer might have been a coincidental occurrence or represent exposure to an unrecognized causative agent. Investigators recommended strengthening the radiation safety program and conducting further radiation monitoring. |
| 2008 | Mining                           | Unknown                                           | Blood (3)                                                           | Record review                    | Unusual distribution of cancer                                                   | Three cases of hairy cell leukemia among mine workers were determined to be usual. Investigators concluded there was no agent known to cause hairy cell leukemia, and there was not an occupational exposure that could be definitively linked to the cases. Investigators recommended monitoring, employee education on risk factors for cancer, and cancer screening if warranted.†                                                                                                                     |
| 2009 | Healthcare and Social Assistance | Unknown                                           | Brain (3)                                                           | Rate calculations                | Excess cancer cases and unusual distribution of cancer                           | Investigators concluded that the cases of astrocytoma were a cluster. However, they did not believe that their occurrence was associated with workplace exposures because not enough time had passed between workplace exposure to a carcinogen and the growth of the brain cancers (latency), and there were no exposures known to be associated with increased brain cancer risk. No recommendations were made.                                                                                         |
| 2011 | Healthcare and Social Assistance | Unknown                                           | Kidney (3)                                                          | Record review                    | Unusual distribution of cancer                                                   | While the occurrence of three cases of renal cell carcinoma among employees in a 2-year period was unusual, investigators concluded the cases of renal cell carcinoma were likely coincidental because there was a lack of common exposure or exposure to a known                                                                                                                                                                                                                                         |

\* Final documentation for HHEs were unpublished, except as noted.

† Aristeguieta C, de Perio MA. Three cases of hairy cell leukemia in coal miners. *Leukemia & Lymphoma*. 2011/12/01 2011;52(12):2391-2392. doi:10.3109/10428194.2011.610011

|      |               |         |           |               |                                                        |                                                                                                                                                                                                                                                                                                                                                                             |
|------|---------------|---------|-----------|---------------|--------------------------------------------------------|-----------------------------------------------------------------------------------------------------------------------------------------------------------------------------------------------------------------------------------------------------------------------------------------------------------------------------------------------------------------------------|
|      |               |         |           |               |                                                        | carcinogen at work. Investigators recommended that the workplace encourage employees to learn about their risk factors for cancer, measures they could take to reduce their risk for preventable cancers, and availability of cancer screening programs for some types of cancer.                                                                                           |
| 2017 | Manufacturing | Unknown | Brain (3) | Record review | Excess cancer cases and unusual distribution of cancer | Investigators concluded that the three cases of glioblastoma could not be linked to an occupational exposure. Investigators recommended that the workplace encourage employees to learn about their risk factors for cancer, measures they could take to reduce their risk for preventable cancers, and availability of cancer screening programs for some types of cancer. |
